# Supplementary material for: Widespread Recombination Suppression Facilitates Plant Sex Chromosome Evolution
Source: PubMed Central journal article supplement (PMC7947811; doi:10.1093/molbev/msaa271), 2020-10-23
Supplement: msaa271_supplementary_data.pdf [file msaa271_supplementary_data.pdf]

1 Supplementary Materials

2 Supplementary Tables

3

| Table S1. C-values calculated from two XX/XY-cytotype individuals [an F <sub>3</sub> Male (ID: TxTx P5 MG) and F <sub>3</sub> Female (ID: TxTx P5 MG)] of <i>Rumex hastatulus</i> |       |
|-----------------------------------------------------------------------------------------------------------------------------------------------------------------------------------|-------|
|                                                                                                                                                                                   | XX/XY |
| Female                                                                                                                                                                            | 1.8   |
| Male                                                                                                                                                                              | 1.99  |

4

| Table S2. Counts of <i>Rumex hastatulus</i> individuals of each sex and cytotype sequenced for the linkage map. |            |                                         |
|-----------------------------------------------------------------------------------------------------------------|------------|-----------------------------------------|
|                                                                                                                 | TX (XX/XY) | NC (XX/XY <sub>1</sub> Y <sub>2</sub> ) |
| Male                                                                                                            | 53         | 40                                      |
| Female                                                                                                          | 43         | 56                                      |

5

Table S3. Major linkage groups in both maps of *Rumex hastatulus*

LG ID numbers after Smith 1964

TX (XX/XY)

| Description              | LG ID | Number of independent markers (colocalized markers) | Length (cM) | Length (bp) | Length ( $\mu\text{m}$ , Grabowska-Joachimiak 2015) |
|--------------------------|-------|-----------------------------------------------------|-------------|-------------|-----------------------------------------------------|
| Metacentric autosome     | A1    | 192 (1570)                                          | 101.022     | 344,497,533 | 3.8                                                 |
| Metacentric autosome     | A2    | 276 (3241)                                          | 108.910     | 260,405,700 | 5.02                                                |
| Neo-sex chromosome       | A3    | 108 (338)                                           | 95.789      | 175,013,671 | 2.35                                                |
| Sub-metacentric autosome | A4    | 119 (510)                                           | 48.148      | 158,234,227 | 2.81                                                |

| Sex chromosome                          | XY    | 187 (1186)                                          | 75.521      | 150,617,407 | 3.4 (X)<br>5.89 (Y)                                       |
|-----------------------------------------|-------|-----------------------------------------------------|-------------|-------------|-----------------------------------------------------------|
|                                         |       | 882 (6845)                                          | 429.39      | 1088768538  |                                                           |
| NC (XX/XY <sub>1</sub> Y <sub>2</sub> ) |       |                                                     |             |             |                                                           |
| Description                             | LG ID | Number of independent markers (colocalized markers) | Length (cM) | Length (bp) | Length (physical, as percentage of karyotype, Smith 1964) |
| Metacentric autosome B                  | A1    | 184 (645)                                           | 162.541     |             | 3.67                                                      |
| Metacentric autosome A                  | A2    | 258 (2576)                                          | 167.069     |             | 4.98                                                      |
| Sub-metacentric autosome                | A4    | 103 (552)                                           | 60.524      |             | 2.2                                                       |
|                                         |       |                                                     |             |             |                                                           |

|                |     |            |         |  |                                    |
|----------------|-----|------------|---------|--|------------------------------------|
| Sex chromosome | XYY | 250 (1270) | 137.695 |  | 5.36 (X)<br>4.22 (Y1)<br>3.77 (Y2) |
|                |     | 537 (5043) | 527.829 |  |                                    |

7

Table S4. Sex-linked SNPs of *Rumex hastatulus* based on Hough et al. (2014) pedigree data. TX = XX/XY, NC = XX/XY<sub>1</sub>Y<sub>2</sub>.

|               | Y-<br>segre<br>gatin<br>g<br>(TX) | Y-<br>segre<br>gatin<br>g<br>(NC) | X-<br>segre<br>gatin<br>g<br>(TX) | X-<br>segre<br>gatin<br>g<br>(NC) | Hemizygou<br>s (TX) | Hemizygou<br>s (NC) | Autosoma<br>l (TX) | Autosoma<br>l (NC) |
|---------------|-----------------------------------|-----------------------------------|-----------------------------------|-----------------------------------|---------------------|---------------------|--------------------|--------------------|
| A1            | 14                                | 57                                | 5                                 | 7                                 | 1                   | 1                   | 3894               | 1692               |
| A2            | 3                                 | 137                               | 1                                 | 18                                | 13                  | 5                   | 1700               | 3950               |
| A3            | 12                                | 1172                              | 11                                | 763                               | 6                   | 7                   | 1614               | 410                |
| A4            | 4                                 | 59                                | 0                                 | 33                                | 2                   | 0                   | 1173               | 1691               |
| X             | 1208                              | 980                               | 439                               | 456                               | 50                  | 79                  | 420                | 348                |
| Not<br>placed | 1048                              | 1110                              | 143                               | 173                               | 317                 | 345                 | 1681               | 1714               |

Table S5. Sex-linked SNPs of *Rumex hastatulus* based on Hough et al. (2014) and Beaudry et al. (2019) population data. TX = XX/XY, NC = XX/XY<sub>1</sub>Y<sub>2</sub>.

|            | XY-<br>fixed (TX) | XY-<br>fixed (NC) |
|------------|-------------------|-------------------|
| A1         | 17                | 16                |
| A2         | 4                 | 76                |
| A3         | 7                 | 390               |
| A4         | 5                 | 3                 |
| X          | 1048              | 583               |
| Not placed | 1403              | 1254              |

Table S6. Coefficients of linear models relating base pairs to centimorgans in windows on sections of the sex chromosome and A3 in *Rumex hastatulus*.

| Cytotype | Chromosome     | Block                                                          | Window size (bp) | Mean SNPs per window | Mean coefficient of by-window linear models (cM/bp) |
|----------|----------------|----------------------------------------------------------------|------------------|----------------------|-----------------------------------------------------|
|          | Sex chromosome | Pseudoautosomal and sex-linked recombining region (first 50Mb) | 50000            | 4.415                | $4.02 \times 10^{-7}$                               |
|          |                |                                                                | 100000           | 5.5                  | $1.13 \times 10^{-6}$                               |
|          |                |                                                                | 500000           | 11.386               | $1.43 \times 10^{-6}$                               |
|          |                |                                                                | 1000000          | 19.088               | $1.29 \times 10^{-6}$                               |
|          |                |                                                                | 5000000          | 72.111               | $1.24 \times 10^{-6}$                               |
|          |                | Sex-linked region (second 50Mb)                                | 50000            | 2.563                | $-1.23 \times 10^{-17}$                             |
|          |                |                                                                | 100000           | 2.716                | $-1.28 \times 10^{-17}$                             |
|          |                |                                                                | 500000           | 4.233                | $-1.16 \times 10^{-17}$                             |
|          |                |                                                                | 1000000          | 5.871                | $-4.24 \times 10^{-18}$                             |
|          |                |                                                                | 5000000          | 26                   | $-8.25 \times 10^{-8}$                              |

|       |                                                                                                              |                                                                                                                  |         |                        |                         |
|-------|--------------------------------------------------------------------------------------------------------------|------------------------------------------------------------------------------------------------------------------|---------|------------------------|-------------------------|
| XX/XY | A3 (neo-sex chromosome)                                                                                      | XX/XY-specific                                                                                                   | 50000   | 1.556                  | $-6.57 \times 10^{-18}$ |
|       |                                                                                                              | low-recombination region (final 50Mb)                                                                            | 100000  | 1.68                   | $-5.40 \times 10^{-18}$ |
|       |                                                                                                              |                                                                                                                  | 500000  | 2.1                    | $3.51 \times 10^{-7}$   |
|       |                                                                                                              |                                                                                                                  | 1000000 | 2.8                    | $5.71 \times 10^{-7}$   |
|       |                                                                                                              |                                                                                                                  | 5000000 | 8.4                    | $4.03 \times 10^{-7}$   |
|       |                                                                                                              | High-recombination region / putative XX/XY <sub>1</sub> Y <sub>2</sub> pseudoautosomal region (penultimate 50Mb) | 50000   | 2.778                  | $2.72 \times 10^{-17}$  |
|       |                                                                                                              |                                                                                                                  | 100000  | 3.175                  | $1.25 \times 10^{-6}$   |
|       |                                                                                                              |                                                                                                                  | 500000  | 4.878                  | $1.83 \times 10^{-6}$   |
|       |                                                                                                              |                                                                                                                  | 1000000 | 6.897                  | $1.20 \times 10^{-6}$   |
|       |                                                                                                              |                                                                                                                  | 5000000 | 22.222                 | $8.09 \times 10^{-7}$   |
|       | Shared low-recombination region / putative XX/XY <sub>1</sub> Y <sub>2</sub> sex-linked region (second 50Mb) | 50000                                                                                                            | 1.5     | $1.44 \times 10^{-16}$ |                         |
|       |                                                                                                              | 100000                                                                                                           | 1.5     | $1.44 \times 10^{-16}$ |                         |
|       |                                                                                                              | 500000                                                                                                           | 1.5     | $1.44 \times 10^{-16}$ |                         |
|       |                                                                                                              | 1000000                                                                                                          | 1.5     | $1.44 \times 10^{-16}$ |                         |
|       |                                                                                                              | 5000000                                                                                                          | 1.8     | $2.84 \times 10^{-7}$  |                         |
|       |                                                                                                              |                                                                                                                  | 50000   | 3.243                  | -0.001                  |



|                                   |                                            |                                                                |                         |                                                                                                            |                           |
|-----------------------------------|--------------------------------------------|----------------------------------------------------------------|-------------------------|------------------------------------------------------------------------------------------------------------|---------------------------|
| XX/XY <sub>1</sub> Y <sub>2</sub> | Sex chromosome                             | Pseudoautosomal and sex-linked recombining region (first 50Mb) | 100000                  | 3.948                                                                                                      | -0.001                    |
|                                   |                                            |                                                                | 500000                  | 7.567                                                                                                      | -2.22 x 10 <sup>-5</sup>  |
|                                   |                                            |                                                                | 1000000                 | 11.641                                                                                                     | -3.08 x 10 <sup>-5</sup>  |
|                                   |                                            |                                                                | 5000000                 | 45.4                                                                                                       | 2.27 x 10 <sup>-7</sup>   |
|                                   |                                            | Sex-linked region (second 50Mb)                                | 50000                   | 1.827                                                                                                      | -3.01 x 10 <sup>-17</sup> |
|                                   |                                            |                                                                | 100000                  | 2                                                                                                          | -2.26 x 10 <sup>-17</sup> |
|                                   |                                            |                                                                | 500000                  | 2.8                                                                                                        | -1.61 x 10 <sup>-17</sup> |
|                                   |                                            |                                                                | 1000000                 | 2.8                                                                                                        | -1.61 x 10 <sup>-17</sup> |
|                                   |                                            |                                                                | 5000000                 | 6                                                                                                          | -1.15 x 10 <sup>-17</sup> |
|                                   |                                            |                                                                | A3 (neo-sex chromosome) | High-recombination region / putative XX/XY <sub>1</sub> Y <sub>2</sub> pseudoautosomal region (final 50Mb) | 50000                     |
|                                   | 100000                                     | 4                                                              |                         |                                                                                                            | 5.75 x 10 <sup>-5</sup>   |
|                                   | 500000                                     | 9.576                                                          |                         |                                                                                                            | 2.39 x 10 <sup>-6</sup>   |
|                                   | 1000000                                    | 16.205                                                         |                         |                                                                                                            | 1.92 x 10 <sup>-6</sup>   |
|                                   | 5000000                                    | 63.2                                                           |                         |                                                                                                            | -1.22 x 10 <sup>-7</sup>  |
|                                   | Shared low-recombination region / putative | 50000                                                          |                         | 2.355                                                                                                      | 1.39 x 10 <sup>-17</sup>  |
|                                   |                                            | 100000                                                         |                         | 2.517                                                                                                      | 1.27 x 10 <sup>-17</sup>  |
|                                   |                                            | 500000                                                         |                         | 3.65                                                                                                       | 3.16 x 10 <sup>-18</sup>  |

|  |  |                                                         |         |       |                          |
|--|--|---------------------------------------------------------|---------|-------|--------------------------|
|  |  | XX/XY <sub>1</sub> Y <sub>2</sub> sex-<br>linked region | 1000000 | 4.563 | 3.62 x 10 <sup>-18</sup> |
|  |  | (penultimate<br>50Mb)                                   | 5000000 | 14.6  | 1.28 x 10 <sup>-21</sup> |

12

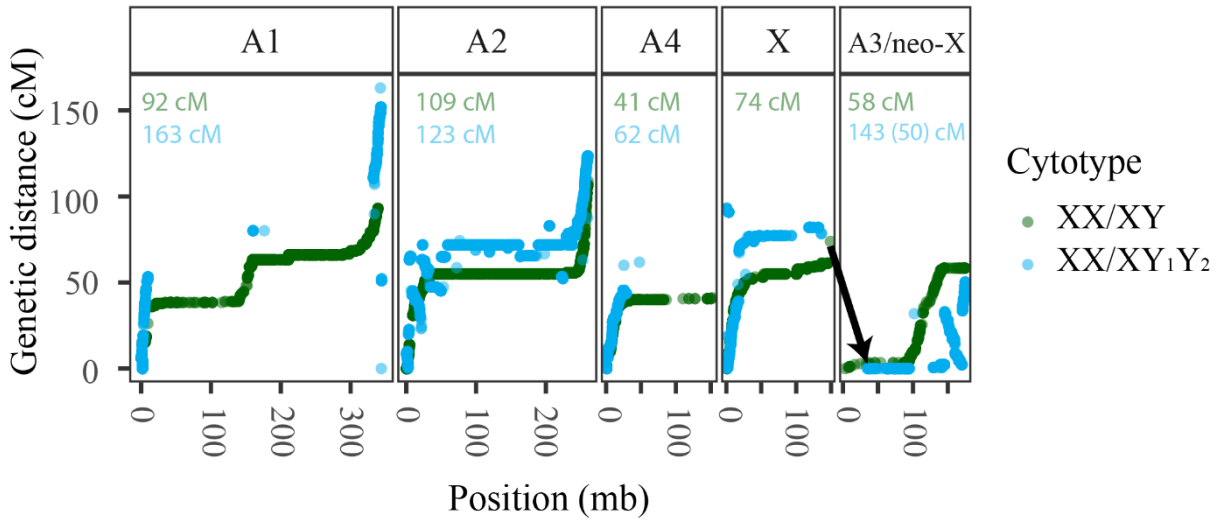

14

15 Figure S1. Marey map relating linkage map sex-averaged recombination position (cM) to  
 16 physical genetic position in the XX/XY-cytotype genome assembly (Mb; panels are XX/XY-  
 17 cytotype chromosomes) for the XX/XY cytotype (green) and XX/XY<sub>1</sub>Y<sub>2</sub> cytotype (blue) of  
 18 *Rumex hastatulus*. XX/XY<sub>1</sub>Y<sub>2</sub> cytotype map on the neo-X has been artificially reset to zero,  
 19 to ease comparison with map distances along A3 in XX/XY cytotype (as shown by the black  
 20 arrow). Total map length for each chromosome in top right corner of each panel, XX/XY  
 21 cytotype (green) and XX/XY<sub>1</sub>Y<sub>2</sub> cytotype (blue), with the map length specific to the neo-X in  
 22 brackets in the A3/neo-X panel.

23

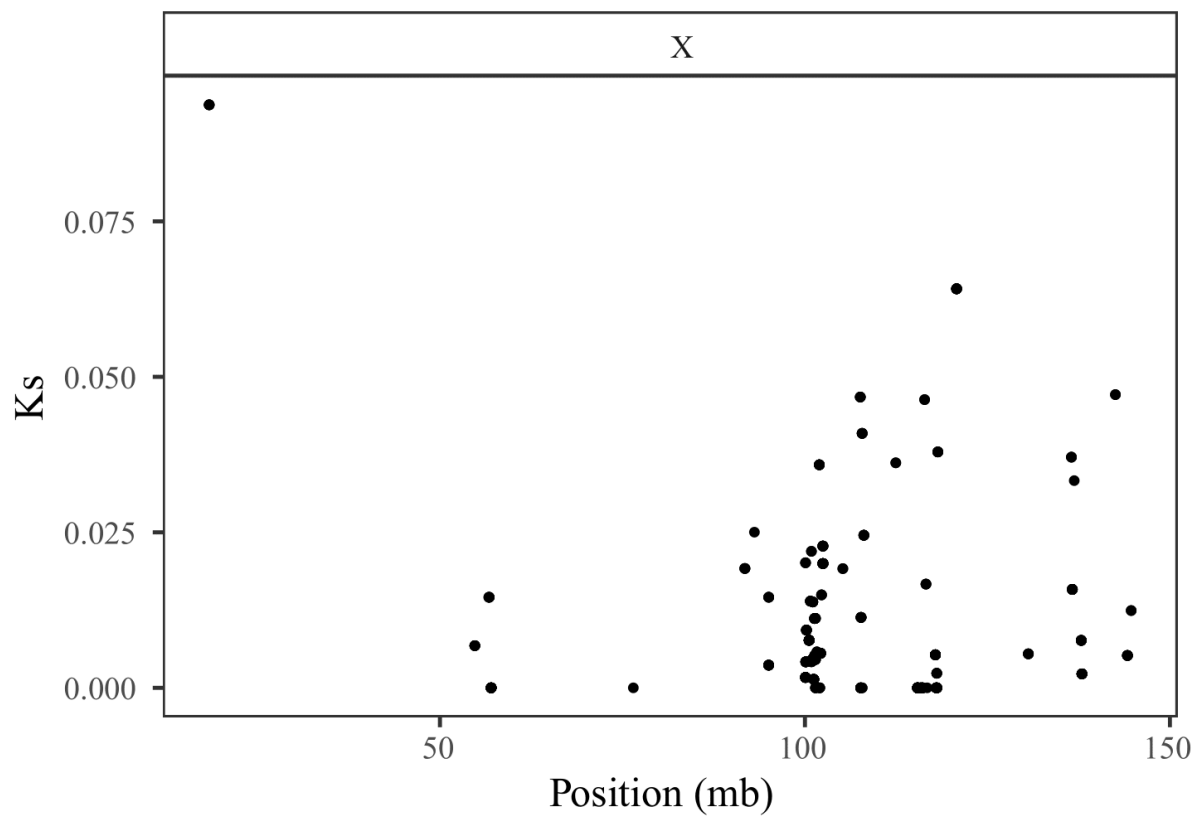

25

26 Figure S2. Synonymous site divergence (Ks) between the X and Y chromosome along the  
27 shared X chromosome of *Rumex hastatulus* from (Hough et al. 2014).

28

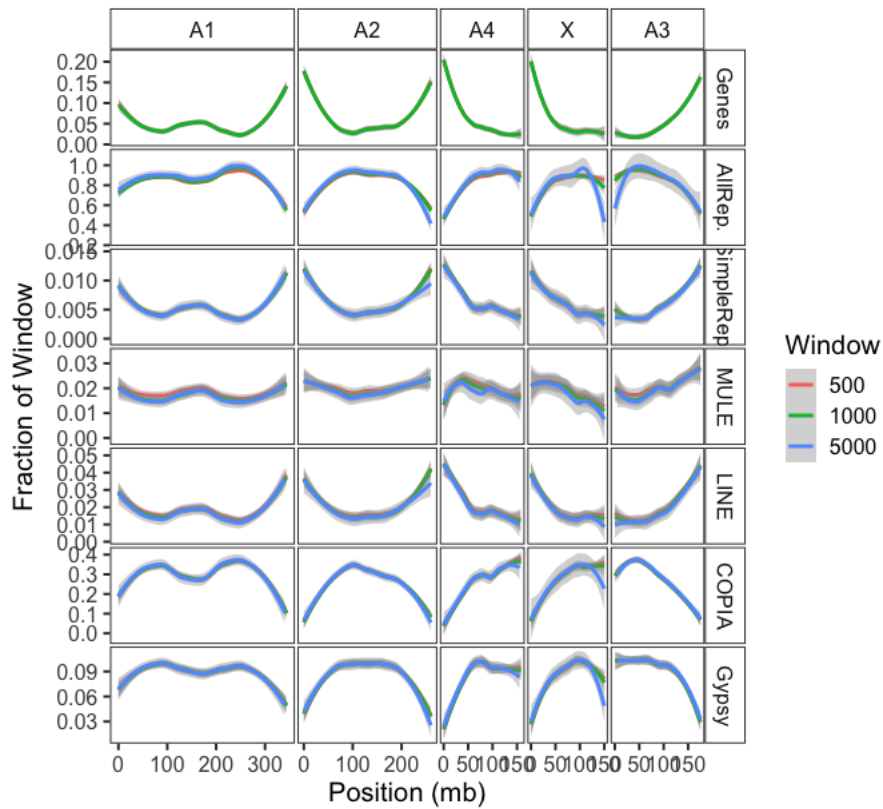

29

30 Figure S3. Genome content across the chromosomes of *Rumex hastatulus*, measured as  
 31 proportion of window across varying window sizes (red: 500 kilobases; green: 1000  
 32 kilobases; blue: 5000 kilobases). Panels show repeat-filtered gene density, density of all  
 33 repetitive elements (“AllRep.”), simple repeat density (“simpRep”), MULE element density,  
 34 LINE element density, COPIA element density, and Gypsy element density.

35

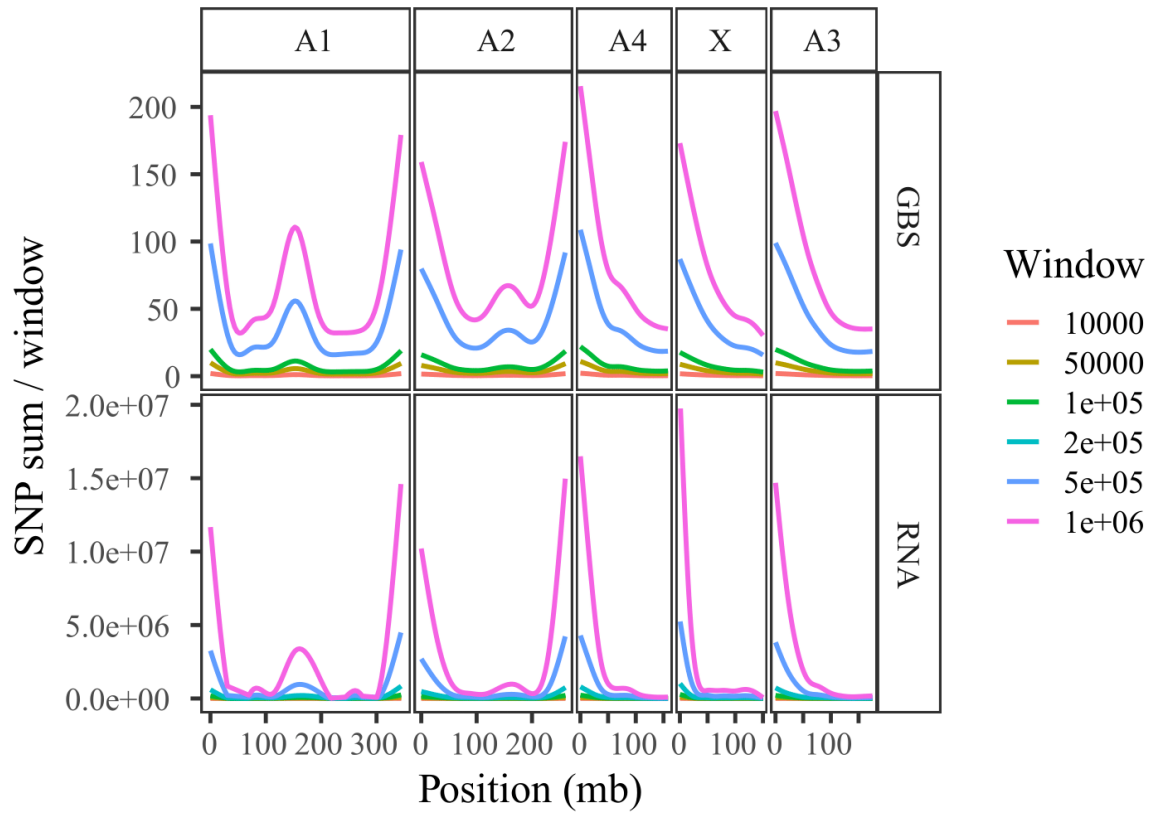

36

37 Figure S4. SNP density for GBS and RNA data sets summed across the five chromosomes of  
 38 *Rumex hastatulus* in windows of varying sizes (colour). Window sizes are in base pairs.  
 39
